# Supplementary material for: Development, cross-validation and greenness assessment of capillary electrophoresis method for determination of ALP in pharmaceutical dosage forms – an alternative to liquid chromatography
Source: Royal Society of Chemistry journal article supplement (doi:10.1039/d4ra05715e), 2024-01-01
Supplement: d4ra05715e1.pdf [file d4ra05715e1.pdf]

## Supplementary information

### Development, cross-validation and greenness assessment of capillary electrophoresis method for determination of alpelisib in pharmaceutical dosage forms – an alternative to liquid chromatography

Zvonimir Mlinarić<sup>a</sup>, Lu Turković<sup>a</sup>, Ivor Babić<sup>a</sup>, Tajana Silovski<sup>b,c</sup>, Nina Kočevar Glavač<sup>d</sup>,  
Miranda Sertić<sup>a</sup>

<sup>a</sup> University of Zagreb Faculty of Pharmacy and Biochemistry, Department of Pharmaceutical Analysis, Ante Kovačića 1, 10000 Zagreb, Croatia

<sup>b</sup> University Hospital Centre Zagreb, Department of Oncology, Kišpatićeva 12, 10000 Zagreb, Croatia

<sup>c</sup> University of Zagreb School of Medicine, Šalata 2, 10000 Zagreb, Croatia

<sup>d</sup> University of Ljubljana, Faculty of Pharmacy, Department of Pharmaceutical Biology, Aškerčeva cesta 7, 1000, Ljubljana, Slovenia

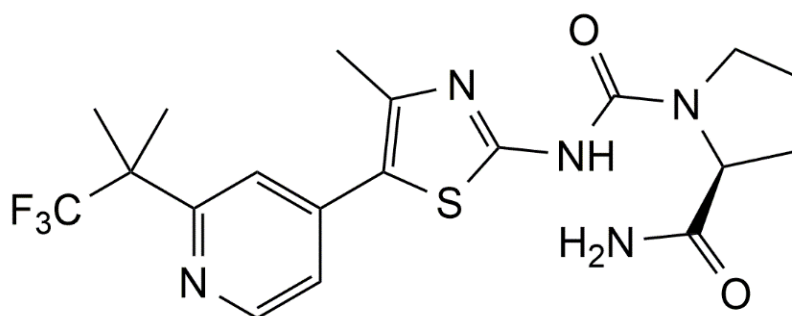

**Figure S1.** Chemical structure of alpelisib. Drawn by ChemDraw Professional 15.0 (PerkinElmer, Shelton, CT, USA)

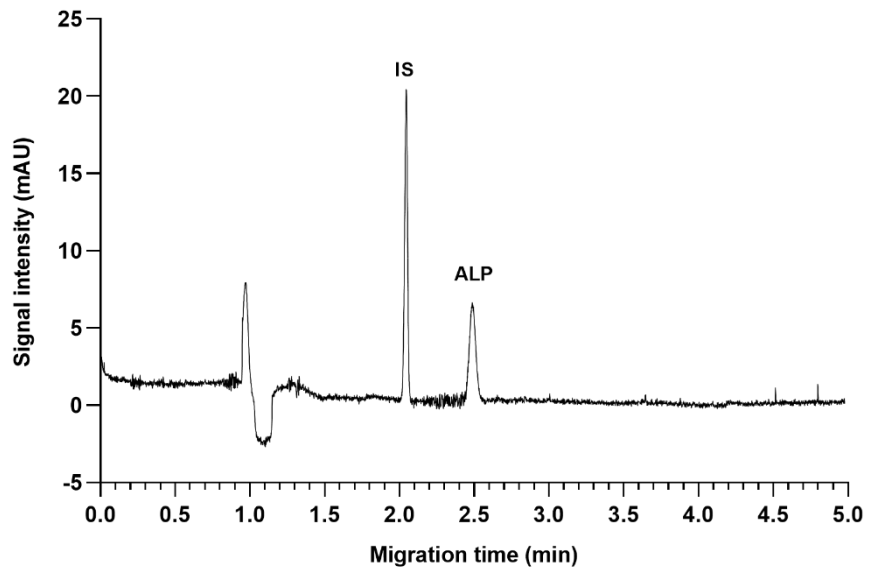

**Figure S2.** MEKC electropherogram of ALP and IS, 25 mM borate at pH 9.3, 20 mM SDS, 30 kV, 30 °C

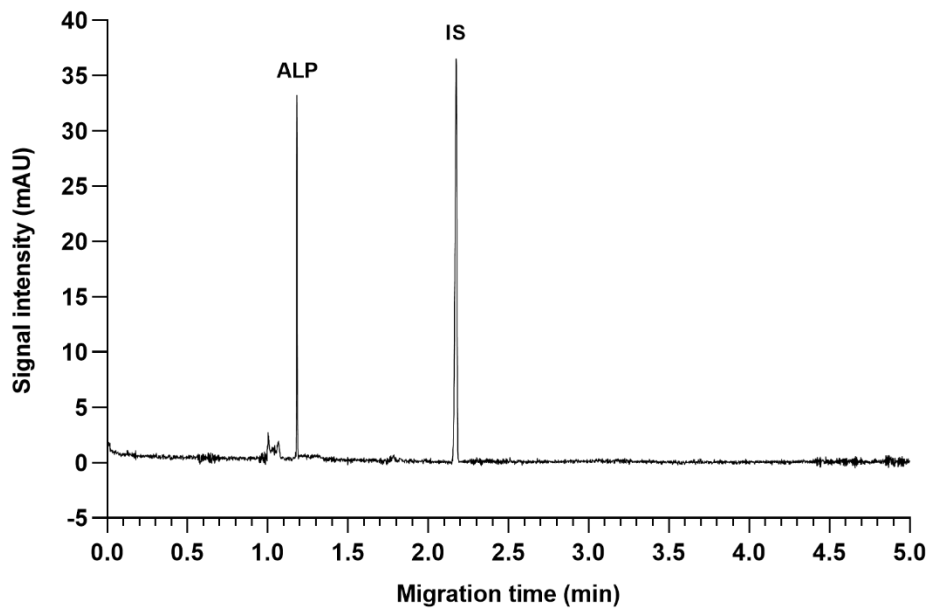

**Figure S3.** Electropherogram of ALP and IS, 25 mM borate at pH 9.3, 10% MeOH, 30 mM borate, 30 °C, 30 kV

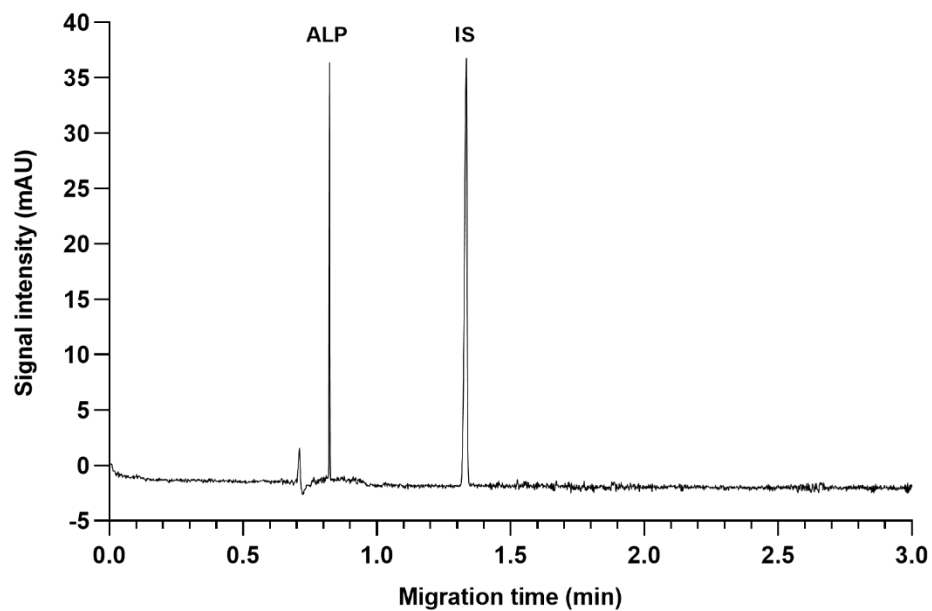

**Figure S4.** Electropherogram of ALP pharmaceutical dosage form with added IS at 50 µg/mL, 25 mM borate at pH 9.3, 30 kV, 30 °C

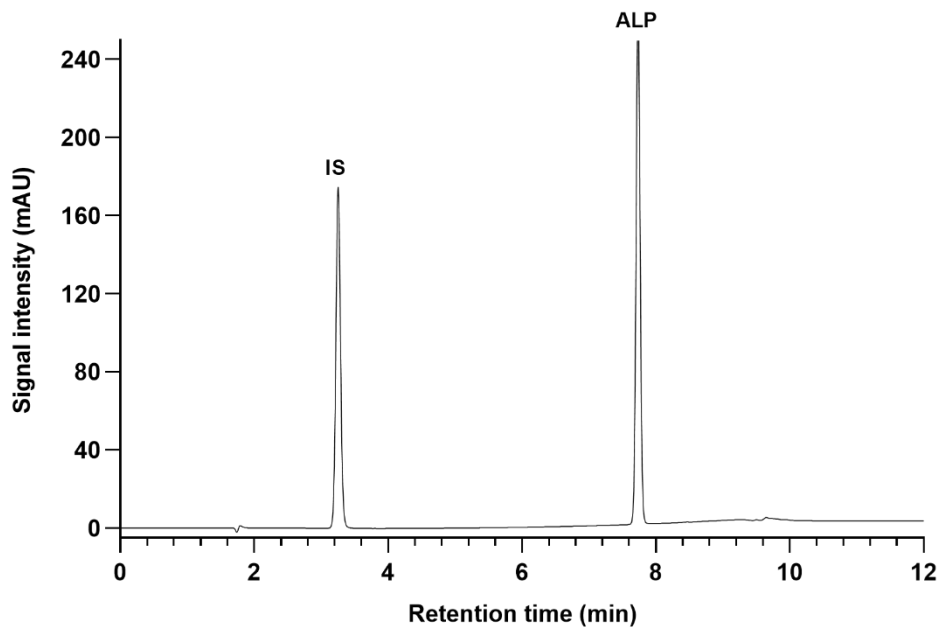

**Figure S5.** Chromatogram of ALP pharmaceutical dosage form with added IS at 50 µg/mL, detection at 315 nm

**Table S1.** Inputs for calculation of AGREE scores for CE and LC methods

| Principle                            | Weight | CE                                          | LC                                          |
|--------------------------------------|--------|---------------------------------------------|---------------------------------------------|
| Sampling                             | 1      | External sample preparation (reduced steps) | External sample preparation (reduced steps) |
| Amount of sample (g or mL)           | 2      | 0.02                                        | 0.02                                        |
| Positioning of analytical device     | 1      | at-line                                     | at-line                                     |
| Major steps                          | 1      | 3 or fewer                                  | 3 or fewer                                  |
| Automation; sample preparation       | 1      | semi-automatic, not miniaturized            | semi-automatic, not miniaturized            |
| Derivatization                       | 1      | no                                          | no                                          |
| Amount of waste (g or mL)            | 2      | 0.15 mL                                     | 16 mL                                       |
| Number of analytes, samples per hour | 2      | 1 analyte, 7 samples per hour               | 1 analyte, 3 samples per hour               |
| Energy                               | 2      | 0,015 kWh                                   | LC                                          |
| Bio-based reagents                   | 1      | Some are bio-based                          | Some are bio-based                          |
| Use of toxic reagents                | 2      | Yes, 0.01 mL                                | Yes, 9.5 mL                                 |
| Threats                              | 1      | Highly flammable                            | Highly flammable                            |

**Table S2.** AGREE scores for individual greenness criteria for CE and HPLC methods

| Principle                            | Weight ( $w_i$ ) | CE score ( $s_i$ ) | LC score ( $s_i$ ) |
|--------------------------------------|------------------|--------------------|--------------------|
| Sampling                             | 1                | 0.30               | 0.30               |
| Amount of sample (g or mL)           | 2                | 1.00               | 1.00               |
| Positioning of analytical device     | 1                | 0.33               | 0.33               |
| Major steps                          | 1                | 1.00               | 1.00               |
| Automation; sample preparation       | 1                | 0.25               | 0.25               |
| Derivatization                       | 1                | 1.00               | 1.00               |
| Amount of waste (g or mL)            | 2                | 0.9488             | 0.3231             |
| Number of analytes, samples per hour | 2                | 0.4210             | 0.2152             |
| Energy                               | 2                | 1.00               | 0.50               |
| Bio-based reagents                   | 1                | 0.50               | 0.50               |
| Use of toxic reagents                | 2                | 0.80               | 0.2108             |
| Threats                              | 1                | 0.80               | 0.80               |

AGREE score can be calculated according to the following equation where  $w_i$  is the weight factor for the greenness principle  $i$  with a corresponding individual score  $S_i$ .

$$AGREE \text{ score} = \frac{\sum_{i=1}^{12} w_i S_i}{\sum_{i=1}^{12} w_i}$$

AGREE scores for CE and HPLC methods are then calculated as follows:

$$AGREE \text{ score (CE)} = \frac{\sum_{i=1}^{12} w_i S_i}{\sum_{i=1}^{12} w_i} = \frac{12.5196}{17} = 0.7364$$

$$AGREE \text{ score (HPLC)} = \frac{\sum_{i=1}^{12} w_i S_i}{\sum_{i=1}^{12} w_i} = \frac{8.6782}{17} = 0.5105$$
